# Supplementary material
Source: PubMed Central journal article supplement (PMC4108980)
Supplement: Supp_Figure1.pdf [file Supp_Figure1.pdf]

## Supplementary Data

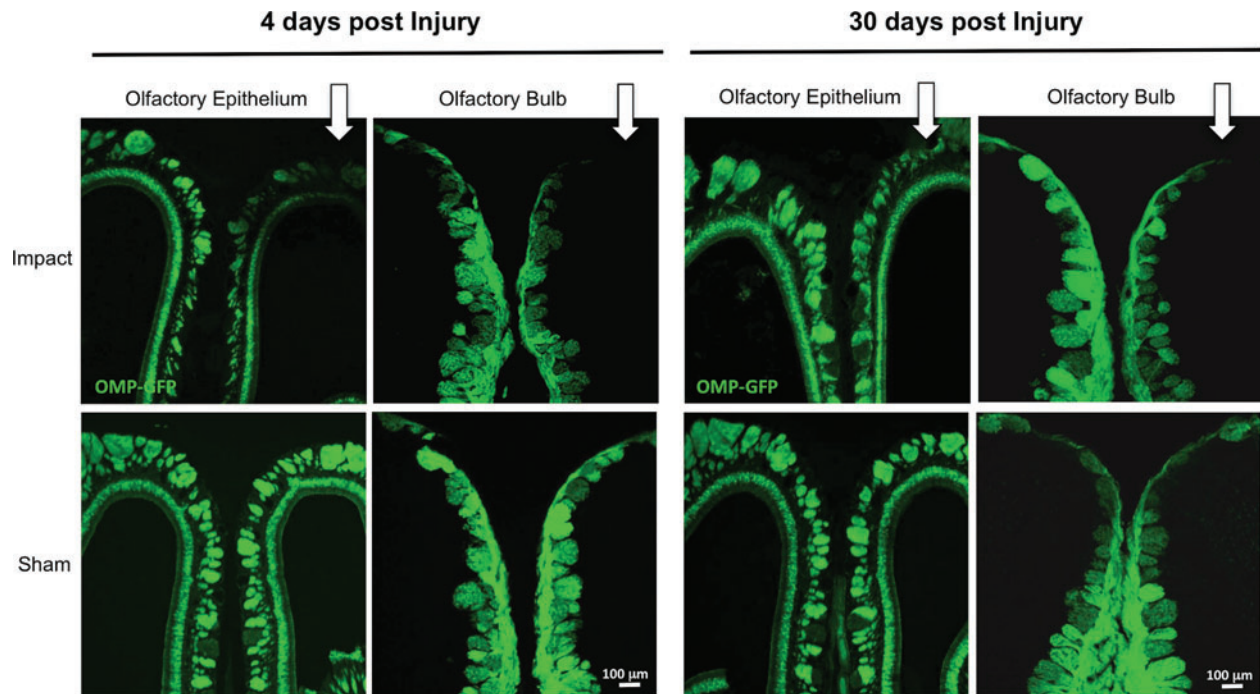

**SUPPLEMENTARY FIG. 1.** Injury and recovery of olfactory tissue after olfactory bulb impact (OBI). Confocal images ( $5\times$ ) of medial region of both olfactory bulbs (OBs) and septal region of OE in (OMP-GFP) animals. Images show partial return of olfactory circuitry at 30 days postInjury, compared to 4 days. Arrow indicates impacted side. GFP, green fluorescent protein.
