# Supplementary material
Source: PubMed Central journal article supplement (PMC4108980)
Supplement: Supp_Figure2.pdf [file Supp_Figure2.pdf]

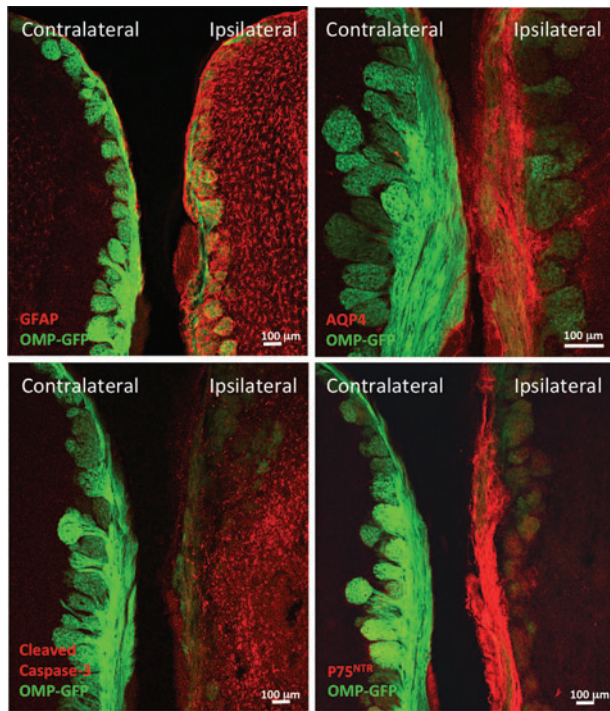

**SUPPLEMENTARY FIG. 2.** Select markers of traumatic brain injury (TBI) in the olfactory bulb (OB) 4 days post-OBI (olfactory bulb impact). Confocal images ( $5\times$ ) of TBI markers in the OBs of (OMP-GFP) mice after OBI. Ipsilateral is impacted bulb and contralateral is nonimpacted bulb. GFP, green fluorescent protein.
