# Supplementary material
Source: PubMed Central journal article supplement (PMC4108980)
Supplement: Supp_Figure4.pdf [file Supp_Figure4.pdf]

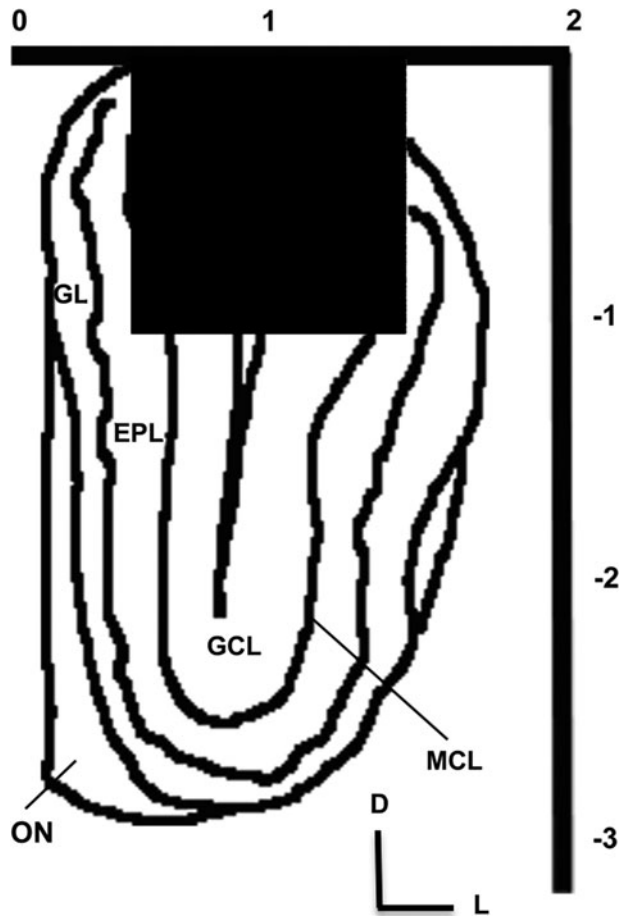

**SUPPLEMENTARY FIG. 4.** Stereotaxic diagram of olfactory bulb impact (OBI) site. Illustration showing the comparative size and depth of the impactor tip with respect to a central coronal section of the olfactory bulb (OB). The layers of the OB are marked: ON, outer nerve layer; GL, glomerular layer; EPL, external plexiform layer; MCL, mitral cell layer; GCL, granule cell layer. The dark box in the dorsal OB shows the region displaced by the impactor tip, which is 1 mm in diameter and 1 mm deep in its impact. The x-axis is set to zero at the mid-line and extends toward the lateral OB with a scale of 1 mm. The y-axis is also in millimeters and begins at the surface of the OB, which is where we set the impactor to zero.
